# Supplementary material for: Investigating regional excess mortality during 2020 COVID-19 pandemic in selected Latin American countries
Source: PubMed Central journal article supplement (PMC8564791; doi:10.1186/s41118-021-00139-1), 2021-11-03
Supplement: 41118_2021_139_MOESM1_ESM.pdf [file 41118_2021_139_MOESM1_ESM.pdf]

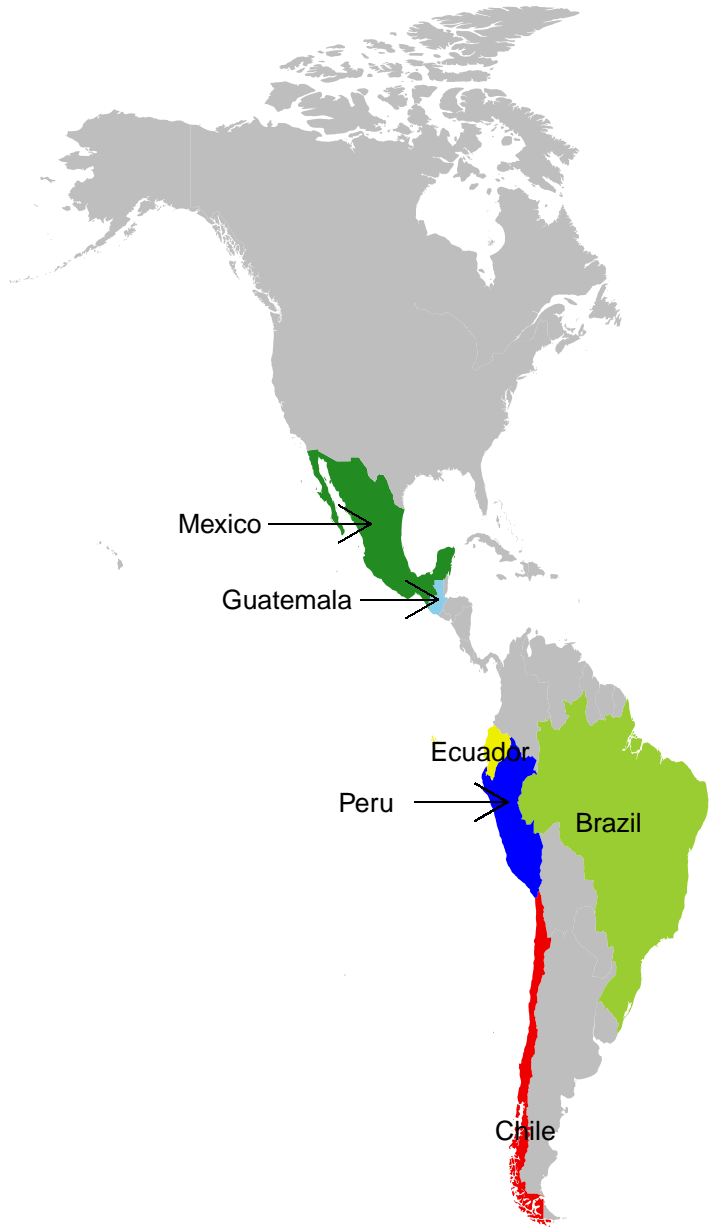

Mexico

Guatemala

Ecuador

Peru

Brazil

Chile
